# Supplementary material for: Hexamethylene-1,6-bis(N-d-glucopyranosylamine) as a novel corrosion inhibitor for oil and gas industry: electrochemical and computational analysis
Source: Royal Society of Chemistry journal article supplement (doi:10.1039/c9nj00023b), 2019-01-01
Supplement: c9nj00023b1.pdf [file c9nj00023b1.pdf]

**Hexamethylene-1,6-bis(N-D-glucopyranosylamine) as a novel corrosion inhibitor for oil  
and gas industry: Electrochemical and computational analysis**

I.B. Onyeachu<sup>a</sup>, D.S. Chauhan<sup>a</sup>, K.R. Ansari<sup>a</sup>, I.B. Obot<sup>a</sup>, M.A. Quraishi<sup>a,\*</sup>, Aeshah H. Alamri<sup>b</sup>

<sup>a</sup>*Center of Research Excellence in Corrosion, Research Institute, King Fahd University of  
Petroleum and Minerals, Dhahran 31261, Saudi Arabia.*

<sup>b</sup>*Chemistry Department, College of Science, Imam Abdulrahman Bin Faisal University, P.O. Box  
76971, Dammam, Saudi Arabia*

\*Corresponding author

Phone no.: +966-538600057

E-mail: [mumtaz.quraishi@kfupm.edu.sa](mailto:mumtaz.quraishi@kfupm.edu.sa)

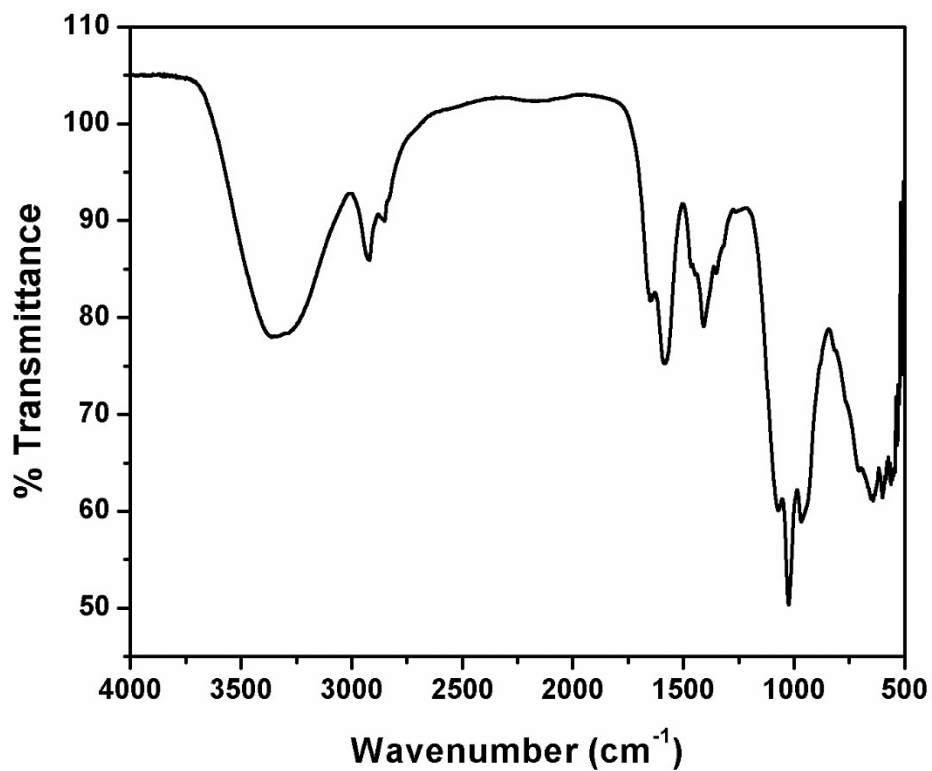

**Figure S1** FTIR spectrum of HGA.
